1 PLUMAGE BALANCES CAMOUFLAGE AND THERMOREGULATION IN HORNED  
2 LARKS (*EREMOPHILA ALPESTRIS*)

3

4 The authors wish to be identified to the reviewers.

5

6 Nicholas A. Mason<sup>1,2</sup>, Eric A. Riddell<sup>1,3</sup>, Felisha Romero<sup>1</sup>, Carla Cicero<sup>1</sup>, Rauri C.K.

7 Bowie<sup>1,4</sup>

8

9 <sup>1</sup>Museum of Vertebrate Zoology, University of California, Berkeley, California, USA

10 <sup>2</sup>Museum of Natural Science and Department of Biological Sciences, Louisiana State  
11 University, Baton Rouge, Louisiana, USA

12 <sup>3</sup>Iowa State University, Department of Ecology, Evolution, and Organismal Biology,  
13 Ames, Iowa, USA

14 <sup>4</sup>Department of Integrative Biology, University of California, Berkeley, California, USA

15 \* Corresponding author: [mason@lsu.edu](mailto:mason@lsu.edu)

16

17 Keywords: Alaudidae, color, background matching, crypsis, homeostasis, near-infrared,  
18 patterning, physiology, water balance

19 Short Title: Camouflage and thermoregulation in larks

20 Word count: 8639

21 Article type: Major article for submission to *American Naturalist*

22 Submission contents: main text, four figures, two tables, supplementary information

23 **Abstract**

24 Animal coloration serves many biological functions and must therefore balance  
25 potentially competing selective pressures. For example, many animals have  
26 camouflage, in which coloration matches the visual background against which predators  
27 scan for prey. However, different colors reflect different amounts of solar radiation and  
28 may therefore have thermoregulatory implications as well. In this study, we examined  
29 geographic variation in dorsal patterning, color, and solar reflectance among Horned  
30 Larks (*Eremophila alpestris*) of the western United States. We found associations  
31 between dorsal plumage brightness, hue, and patterning relative to the soil conditions  
32 where specimens were collected. Specifically, brighter dorsal plumage corresponded to  
33 brighter soil, while redder, more saturated hues in dorsal plumage corresponded to  
34 redder soils. Furthermore, backs with more high-contrast patterning were more common  
35 among females and also associated with soil that had coarser soil fragments,  
36 suggesting that lark plumage has been selected to optimize background matching in  
37 different environments. We also found that larks exhibited higher solar reflectance in  
38 hotter and more arid environments, which lowers the water requirements for  
39 homeothermy. Taken together, these findings suggest that natural selection has  
40 balanced camouflage and thermoregulation in Horned Larks across a wide variety of  
41 soil types and abiotic conditions.

## 42 **Introduction**

43           Animal colors and patterns constitute complex phenotypes that are shaped by a  
44 wide array of biotic and abiotic processes (Burt 1981; Vo et al. 2011; Cuthill et al.  
45 2017). For example, some species have bright colors involved in sexual selection via  
46 mate choice (Andersson and Simmons 2006; Shultz and Burns 2017), whereas others  
47 have cryptic colors and patterns driven by natural selection to avoid visual detection by  
48 predators (Cott 1944; Endler 1978). Furthermore, animal colors have implications for  
49 maintaining homeostasis in different environments due to differences in the reflectance  
50 of light wavelengths from solar radiation (Walsberg 1983; Wolf and Walsberg 2000).  
51 Thus, animal coloration and patterning must balance multiple selective pressures that  
52 may conflict or act synergistically to produce multifunctional phenotypes that vary  
53 among populations and species (Caro 2017). Among the wide array of biological  
54 processes affecting animal colors, camouflage and thermoregulation are thought to  
55 have a particularly strong influence on coloration because of their direct impact on  
56 survival.

57           Camouflage includes a suite of physical and behavioral attributes that deter  
58 visual detection by predators and is prevalent among various animal lineages, including  
59 arthropods (Farkas et al. 2013; Stevens et al. 2014) and vertebrates (Rosenblum et al.  
60 2009; Isaac and Gregory 2013; Boratyński et al. 2017). Also known as background  
61 matching, camouflage favors phenotypes that resemble a random sample of brightness,  
62 hue, and patterning of the visual background against which predators actively scan for  
63 prey (Endler 1978; Merilaita et al. 1999; Michalis et al. 2017). Thermoregulation is also  
64 closely tied to coloration (Walsberg 1983) and sometimes favors phenotypes that either

65 conflict with background matching (Smith et al. 2016) or that simultaneously enable  
66 thermoregulation and camouflage (Wacker et al. 2016). Many species conform to  
67 ‘Gloger’s Rule,’ a highly prevalent ecogeographic pattern that ascribes lighter colors to  
68 more xeric environments and darker colors to more mesic environments (Gloger 1833;  
69 Delhey 2019; Marcondes et al. 2020). This widespread trend is thought to be the  
70 product of multiple selective pressures, including camouflage and thermoregulation  
71 (Burt 2004; Delhey et al. 2019). Plumage reflects and absorbs light that includes  
72 wavelengths within the visual range of birds (UV-VIS: 300–700 nm) as well as near-  
73 infrared wavelengths (NIR: 700–2,600 nm), both of which serve important roles in light  
74 and heat absorptance (Stuart-Fox et al. 2017). Within the visual spectrum, darker  
75 feathers tend to absorb more light and heat than lighter feathers (Porter and Gates  
76 1969), but the physical properties of feathers and the ability of incident light to travel  
77 through or become captured by feather microstructures also play important roles  
78 (Walsberg 1988; Wolf and Walsberg 2000). Because NIR wavelengths are not  
79 perceived by predators, reflectance at those wavelengths is not related to camouflage  
80 but may still play an important thermoregulatory role (Medina et al. 2018).

81         Despite the prevalence of camouflage among animals, the majority of studies to  
82 date on background matching have focused on a small number of systems such as  
83 peppered moths (Van’t Hof et al. 2011; Cook and Saccheri 2013), pocket mice  
84 (Nachman et al. 2003; Linnen et al. 2009), White Sands lizards (Rosenblum et al. 2010;  
85 Laurent et al. 2016), and a few ground-nesting birds (Troscianko et al. 2016; Stevens et  
86 al. 2017). Most of these systems involve discrete phenotypic variants that occupy  
87 visually distinct environments. In comparison, continuous variation in background

88 matching across environmental gradients has received far less attention (Stevens and  
89 Merilaita 2009; Caro et al. 2016). Furthermore, studies that simultaneously examine  
90 camouflage and thermoregulation remain scarce, especially among endotherms, such  
91 as birds. Finally, the role of NIR reflectance in potentially mediating tradeoffs between  
92 camouflage and thermoregulation remain largely unexplored (Stuart-Fox et al. 2017;  
93 Medina et al. 2018).

94 To address these knowledge gaps, we examined associations between plumage  
95 reflectance and patterning, soil color and composition, and thermoregulatory models  
96 among geographically variable populations in a widespread songbird, the Horned Lark  
97 (*Eremophila alpestris*). Horned Larks occupy a wide variety of open mesic and arid  
98 habitats, including deserts, fallow agricultural land, tundra, and grasslands (Beason  
99 1995; Mason et al. 2020). Horned larks build nests and glean seeds and insects on the  
100 ground (Wiens and Rotenberry 1979; de Zwaan and Martin 2018). Due to their  
101 preference for habitats with sparse vegetation, larks are thought to rely on substrate  
102 matching to avoid avian predators (Donald et al. 2017). Although camouflage in Horned  
103 Larks has been discussed anecdotally (Zink and Remsen 1986; Mason and Unitt 2018),  
104 associations between phenotypic and environmental variation have not yet been tested  
105 rigorously. Larks also exhibit various physiological adaptations to aridity gradients  
106 (Tieleman et al. 2003b, 2003a), making them an excellent system to study interactions  
107 between camouflage and thermoregulation. If larks exhibit background matching, we  
108 predict that soil conditions will be associated with variation in plumage brightness, color,  
109 and patterning. Furthermore, if plumage also plays a thermoregulatory role, we predict

110 that rates of evaporative water loss and solar reflectance will be associated with  
111 variation in aridity and temperature.

112 To test these predictions, we combined digital photography, color and plumage  
113 analyses, full-spectrum (UV, Visual, NIR) spectroradiometry of museum specimens,  
114 remote sensing data, and simulation-based thermoregulatory models of heat flux to  
115 examine phenotype-environment associations between plumage coloration and  
116 patterning, soil conditions, and climate. This approach allows us to disentangle the  
117 effects of camouflage, thermoregulation, and sexual dimorphism in driving the evolution  
118 and ecology of lark coloration. More broadly, it illustrates how we can understand limits  
119 on the adaptive potential of certain traits such as coloration. For example, warming  
120 climates might select for more reflective features, but at a cost to background matching.  
121 Likewise, habitat alterations might select for darker feathers that impose greater  
122 physiological stress under warming climates. Thus, one selective pressure might have  
123 detrimental effects to another in the evolution of phenotypes. Only by integrating both  
124 background matching and thermoregulatory performance can we understand  
125 evolutionary responses to these different and potentially competing selective pressures.  
126

## 127 **Methods**

### 128 *Digital Photography and Image Analysis*

129 We photographed the dorsal side of 270 Horned Lark specimens from the  
130 Museum of Vertebrate Zoology (MVZ) at the University of California, Berkeley  
131 (Supplementary Table S1), using a Nikon D7000 camera modified for full-quartz  
132 calibration (Advanced Camera Services, Watton, Norfolk, England). We measured up to

133 10 males and 10 females of 17 different subspecies (Figure 1) in the western United  
134 States, preferentially selecting specimens from breeding months (May–August) and with  
135 undamaged plumage. We used a Novoflex Noflexar 30mm f/3.5 lens, which does not  
136 filter out ultraviolet wavelengths and is therefore suitable for measuring plumage  
137 reflectance under an avian visual model. We took two RAW images of each specimen  
138 at ISO200: one image used a Baader Venus-U filter, which captures wavelengths  
139 between ~320–380 nm, and a second image used a Baader UV/IR cut filter, which  
140 captures wavelengths between ~400–680 nm. Each image included a ruler at the height  
141 of the specimen’s dorsal plane with 5% and 80% reflectance standards (Labsphere,  
142 Hutton, NH, USA). We automatically aligned and linearized images using the Image  
143 Calibration Analysis Toolbox (Troschianko and Stevens 2015), which provides a set of  
144 plugins for ImageJ (Schneider et al. 2012), and manually drew polygons corresponding  
145 to the dorsal region of each specimen in ImageJ (Supplementary Figure S1).

146         After processing each image and delimiting the dorsal region of interest, we  
147 converted the channel readings for the UV and visual images to the cone-catch values  
148 of a blue tit visual model (Vorobyev and Osorio 1998). We then converted these cone-  
149 catch values into tetracolorspace measurements (Vorobyev et al. 1998; *sensu* Stoddard  
150 and Prum 2008) of hue, saturation, and chroma using the package pavo v2.2.0 (Maia et  
151 al. 2013, 2019) in the R programming environment (R Core Team 2020). We also  
152 measured achromatic brightness (i.e., total reflectance or luminosity across all  
153 wavelengths) and calculated an index of patterning via a series of Fast Fourier  
154 Transform (FFT) bandpass filters at 49 levels (beginning at 2 pixels and increasing  
155 exponentially by  $\sqrt[8]{2}$  to 128). FFTs are widely applied in digital image analysis



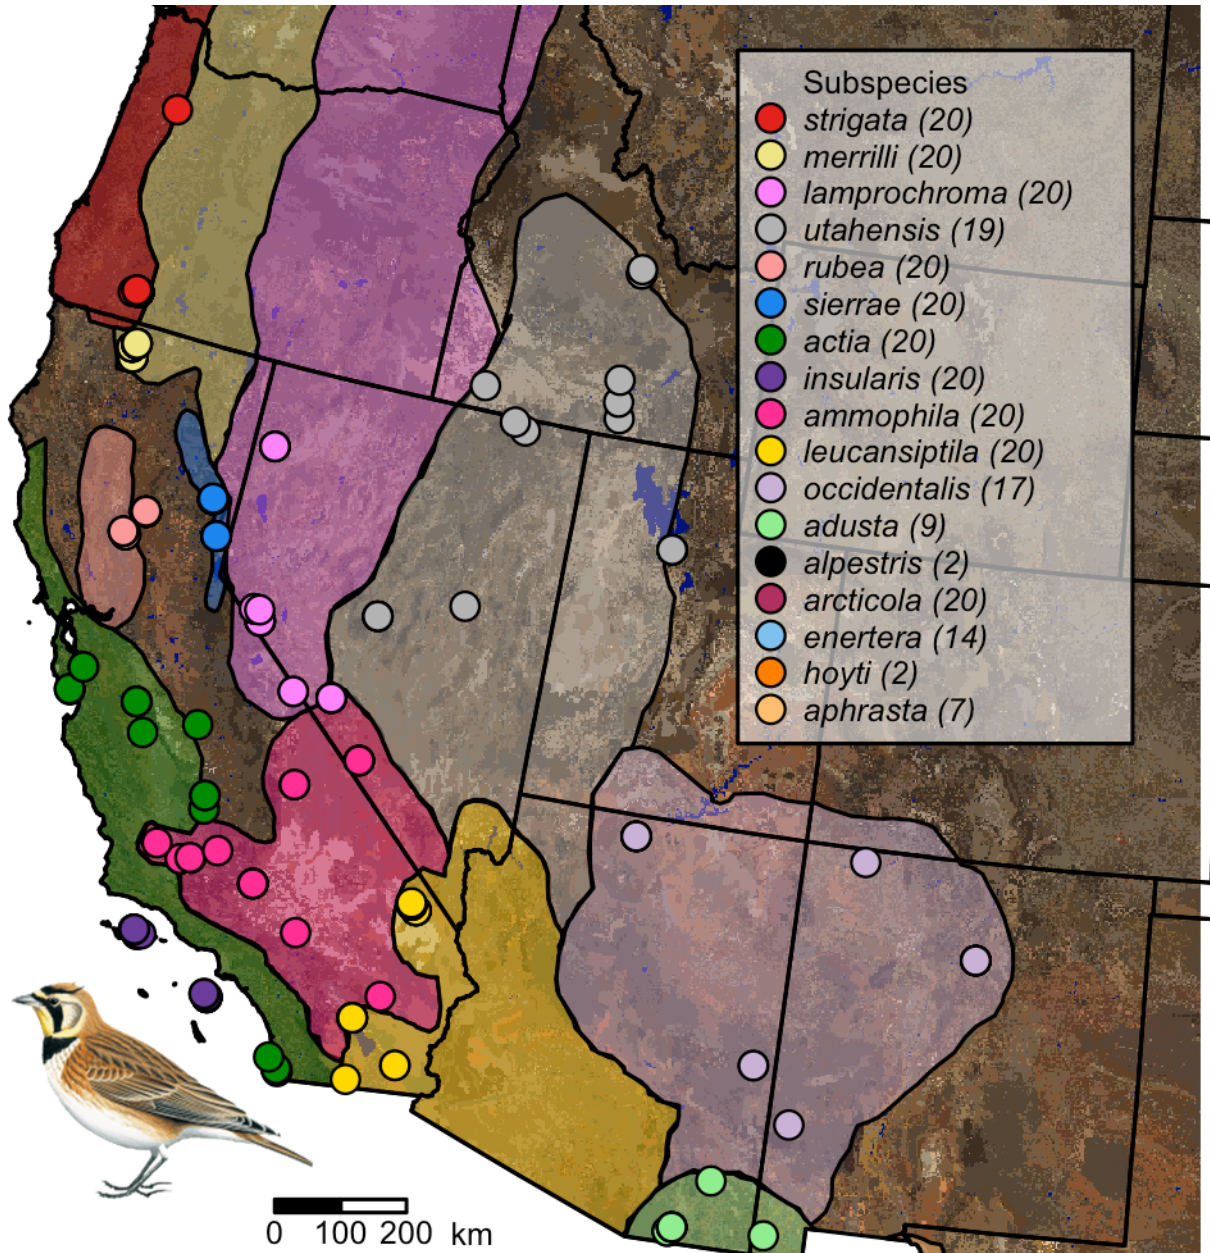

156

157 Figure 1: Sampling map showing localities of vouchered Horned Lark (*Eremophila*  
158 *alpestris*) specimens used in this study. Soil color is based on USDA soil surveys, and  
159 the approximate range of each subspecies is shown in a different color based on Behle  
160 (1942) and new museum records. Some dots may represent more than one individual  
161 sampled from the same locality. The number of samples per subspecies is given in  
162 parentheses next to the name of the subspecies in the legend in the upper right. Some



163 subspecies (*alpestris*, *arctica*, *enertera*, *hoyti*, *aphrasta*) are not shown because we  
164 focused on the geographic area with the most dense sampling.  
165  
166 (Stoddard and Osorio 2019) and can be used to quantify animal patterns based on  
167 neurophysiological processing of spatial patterns (Godfrey et al. 1987; Stoddard and  
168 Stevens 2010; Troscianko et al. 2016; Mason and Bowie 2020). In this process, an  
169 image is converted into a set of sine waves, each with a different frequency and  
170 amplitude. The amplitude or power of each wave indicates how much patterning—or  
171 change between light and dark pixels—occurs at a specific spatial scale. Thus, images  
172 with high power across FFT bandwidths display more patterning (e.g. the dorsal spots  
173 on some larks), whereas images with lower power are more uniformly colored.

174 Finally, we performed a principal component analysis on the three focal plumage  
175 characters: brightness, achieved chroma, and back patterning (total power) to  
176 summarize plumage variation among the sampled larks. We found that the first principal  
177 component axis loaded positively with brightness and dorsal patterning, whereas the  
178 second principal component axis represented a tradeoff between brightness and back  
179 patterning (Supplementary Table S2).

180

### 181 *Measuring Full-spectrum Solar Reflectance*

182 We measured solar reflectance of the lark specimens described above using  
183 recently published methods for estimating heat stress in birds (Riddell et al. 2019). For  
184 each specimen, we measured dorsal and ventral feather reflectance from 350 – 2500  
185 nm using an ASD FieldSpec Pro spectroradiometer (ASD, Inc., 1625 S. Fordam Street,

186 Suite 300, Longmont, CO 80503), and standardized each measurement relative to a  
187 Spectralon™ white standard before recording our measurements. We used a custom-  
188 built tungsten halogen light source to measure feather reflectance 2 cm from the feather  
189 surface, with a 45° angle between the light source and fiber optic cable. This light  
190 source was built using an AC-to-DC voltage converter to inhibit interference from an  
191 alternating source of electrical current. To standardize the angle and distance, we used  
192 a RPH-1 reflection probe holder (Ocean Optics, Inc., Largo, FL). We also used the  
193 reflection probe to standardize the surface area of each measurement to ensure that the  
194 measurements were not influenced by body size. The combination of numerous  
195 measurements per specimen (see below) and the diameter of the probe opening (6.35  
196 mm) ensured that we captured the average solar reflectance of each side for each  
197 specimen.

198 We used ViewSpec software (ASD, Inc.) to measure solar reflectance, recording  
199 ten measurements (five dorsal and five ventral) for each of the 270 specimens. On both  
200 the dorsal and the ventral sides, we recorded one measurement from the crown or neck  
201 and four measurements spread across the breast or mantle for a total of 2,700  
202 measurements. We then used a custom script in Python (v. 3.5) to average these  
203 values for each individual, and corrected the reflectance curves for solar radiation using  
204 the ASTM G-172 standard irradiance spectrum for dry air provided by SMARTs v. 2.9  
205 (Gueymard 2001). We calculated the corrected value by multiplying the intensity of solar  
206 radiation by the empirical reflectance, integrating across all of the wavelengths, and  
207 dividing by the total intensity of solar radiation (Gates 1980).

208

## 209 *Remote Sensing Data*

210 We compiled two different soil data sets to examine associations between lark  
211 dorsal plumage and soil conditions. First, we downloaded a soil color data set based on  
212 an extensive series of United States Department of Agriculture soil surveys of the  
213 contiguous United States, with values that had been converted from Munsell color  
214 charts to RGB color space (Beaudette et al. 2013). Using georeferenced localities of  
215 each lark specimen obtained from the MVZ database Arctos  
216 ([arctos.database.museum](http://arctos.database.museum)), we extracted their respective soil values and performed a  
217 principal components analysis to assess soil color. The first principal component axis  
218 loaded strongly with all three channels corresponding to soil brightness. The second  
219 principal component axis loaded positively with the red channel, but negatively with blue  
220 and green (Supplementary Table S3), and therefore corresponded to soil redness. In  
221 this manner, we obtained soil color data associated with the site of collection of 224 of  
222 our lark specimens. This soil color dataset is limited to the continental United States, so  
223 we were unable to include 46 individuals from populations in Alaska, Canada, and  
224 Mexico in this part of our analysis.

225 We also downloaded harmonized soil property data for the top five centimeters of  
226 soil depth at a 30 arc-second resolution from the WISE30Sec database (Batjes 2016).  
227 WISE30Sec data has been used widely to study soil biogeochemistry for quantifying  
228 global carbon stocks (Sanderman et al. 2017). Although it has not been applied broadly  
229 to organismal biology, this dataset provides ecologically relevant information on clay  
230 abundance, proportion of coarse fragments, and other soil properties relevant to  
231 terrestrial organisms such as Horned Larks. To generate an index of soil surface

232 granularity, we extracted the volume percentage of coarse fragments (> 2 mm) and the  
233 mass percentages of sand, silt, and clay. We then performed a principal component  
234 analysis and found that the first principal component axis loaded positively with coarse  
235 fragments and sand, and negatively with silt and clay (Supplementary Table S4).

236 To examine associations between climate and plumage, we also downloaded all  
237 19 WorldClim bioclimatic variables ([worldclim.org](http://worldclim.org); Hijmans et al. 2005) at a resolution of  
238 30 arc-seconds to examine associations with dorsal plumage. We conducted a principal  
239 component analysis in which the first principal component axis loaded positively with  
240 seasonality, the second principal component axis loaded positively with aridity, and the  
241 third principal component axis loaded positively with temperature (Supplementary Table  
242 S4).

243

#### 244 *Statistical Analyses of Phenotype-Environment Associations*

245 We performed a series of statistical analyses to examine associations between  
246 dorsal plumage and the environment. First, we summarized phenotypic variation among  
247 subspecies by plotting the first two PCA axes of plumage variation and noted clustering  
248 by subspecies and sex. We then compared mean values by first performing an analysis  
249 of variance on the output of linear models, with subspecies as the grouping variable and  
250 with males and females separately. We subsequently used a Tukey's multiple  
251 comparison post-hoc test (Steel et al. 1997) with the HSD test function from the  
252 agricolae package v1.3-3 (de Mendiburu 2020) in R (v4.0.1; R Core Team 2020) to  
253 assign subspecies to groups within each sex based on their mean values. We then  
254 constructed linear models (LMs) to quantify background matching by examining

255 associations between plumage and soil variables with sex included as a main effect.  
256 Specifically, we constructed the following LMs: (1) plumage brightness as the response  
257 variable with soil brightness (soil color PC1) and sex as main effects; (2) plumage  
258 redness as the response variable with soil redness (soil color PC2) and sex as main  
259 effects; and (3) plumage patterning as the response variable with soil granularity (soil  
260 composition PC1) and sex as main effects. We also calculated Pearson's product-  
261 moment correlation coefficients between plumage brightness and soil brightness (soil  
262 color PC1), plumage chroma and soil redness (soil color PC2), and plumage patterning  
263 (plumage patterning PC1) and soil granularity (soil granularity PC1) using the `cor.test()`  
264 function in R (v4.0.1; R Core Team 2020).

265 Finally, we generated additional LMs to simultaneously estimate the influence of  
266 soil and bioclimatic conditions on variation in plumage reflectance. Specifically, we  
267 constructed a LM with dorsal brightness (UV-VIS) as a response variable and soil color,  
268 seasonality, aridity, temperature, and sex as main effects using the `glm()` function in R  
269 (R Core Team 2020). We also generated a LM with dorsal solar reflectance (UV-VIS-IR)  
270 as a response variable and soil color, seasonality, aridity, temperature, and sex as main  
271 effects with the same function and settings.

272

### 273 *Heat flux simulations*

274 We incorporated the empirical measurements of solar-corrected feather  
275 reflectance into a heat flux model to estimate the thermoregulatory differences among  
276 subspecies. This model simulates heat balance using the morphological characteristics

277 of the bird in a complex radiative and thermal environment. The simulation output  
278 produces estimates of net sensible heat flux ( $Q$ ), which was calculated using:

279

$$280 \quad Q = M - E - C \frac{dT_b}{dt} = K_e(T_b - T_e) \quad \text{Eq. 1}$$

281

282 where  $M$  is the heat generated through metabolic processes,  $E$  is the heat lost via  
283 evaporative processes,  $T_b$  is body temperature,  $K_e$  is the effective conductance, and  $T_e$   
284 is the operative temperature. The net sensible heat flux equation estimates the heat flux  
285 required to maintain a stable body temperature given the morphology of the bird and its  
286 interaction with the environment.

287 The heat flux simulation uses biophysical principles to estimate heat flux between  
288 the birds and their environment. We used environmental data generated by *NicheMapR*  
289 (v1.1.3; Kearney and Porter 2020) to estimate the thermal microclimate for larks. First,  
290 we obtained monthly minimum and maximum air temperatures from the *Worldclim*  
291 global climate database for the sites at which specimens had been collected. We then  
292 corrected these temperatures using *NicheMapR* to reflect conditions relevant to larks,  
293 using a reference height of 5 cm above the ground because larks spend most of their  
294 time near the ground. We simulated heat flux assuming two types of soil environments:  
295 a xeric, desert-like environment (sand, soil reflectance = 0.35) and a more mesic  
296 environment (loam, soil reflectance = 0.15; Campbell and Norman 1998). These two  
297 environments represent the extremes of the thermal environment that larks inhabit in  
298 our study area. Assuming a more reflective soil (i.e., sand) in our simulations did not  
299 qualitatively alter our conclusions. We then used these environments to understand the



300 thermal consequences of variation in dorsal and ventral solar-corrected feather  
301 reflectance.

302 We incorporated morphological phenotypes that directly influence reflected solar  
303 radiation in several ways. Our goal was to isolate the importance of dorsal reflectance  
304 for thermoregulation. Thus, we assumed that each phenotype was equivalent among  
305 subspecies, with the exception of feather reflectance. In general, variation in body mass  
306 among subspecies of western Horned Larks is low (males =  $29.7 \text{ g} \pm 2.4$ , females =  
307  $28.5 \pm 3.5 \text{ g}$ ; Behle 1942), suggesting that the differences in mass are unlikely to  
308 substantially influence thermoregulatory differences among subspecies. Estimates of  
309 morphological phenotypes were taken from Riddell et al. (2019) using three specimens  
310 that represented the average mass of a lark in our simulations, but here we briefly  
311 describe the methods. We estimated plumage depth (sensu Kearney et al. 2016) by  
312 measuring the vertical distance from the skin to the outer surface of the feathers using a  
313 Fisherbrand™ 150 mm ruler at 10 locations that spanned the dorsal and ventral side of  
314 each specimen. We also measured the average length of contour feathers across six  
315 feathers per specimen spanning the dorsum and ventrum. To characterize the  
316 approximate shape of larks, we used measurements of the height, length, and width of  
317 the lark specimens. We measured length from crown to the vent, width from shoulder to  
318 shoulder, and height from the back of the dorsal side to the breast at the shoulder  
319 (Kearney et al. 2019). We then used these values to estimate the rough dimensions of a  
320 lark, assuming a spheroid shape (Porter and Kearney 2009). The dimensions of birds in  
321 nature are dependent upon posture and are thus highly variable. By using the same  
322 dimensions for each subspecies, our analysis focuses on the thermoregulatory effects

323 of reflectance and avoids possible noise due to specimen preparation and behavioral  
324 differences among subspecies. The mean body mass for Horned Larks (29.5 g) was  
325 determined by Riddell et al. (2019), which used the Vertnet data aggregator  
326 (vertnet.org). Briefly, body mass was based on collection points in western North  
327 America ( $n = 2,468$ ). The protocol in Riddell *et al.* (2019) removed data greater or less  
328 than two standard deviations from the mean body mass to remove juvenile values  
329 erroneously labelled as adult and extreme outliers that were likely a mistake. Estimates  
330 of mass agree closely with previously published values for subspecies of larks (Behle  
331 1942).

332         The simulation estimates heat flux by integrating morphological phenotypes with  
333 environmental biophysics and behavior. Estimating heat flux in endotherms is  
334 complicated by properties of the insulation layer. We addressed these issues by  
335 integrating a series of equations involved in a two-dimensional heat transfer model to  
336 estimate the flux from the dorsal and ventral components of a bird (Bakken 1981). This  
337 model calculates the total amount of heat absorbed or lost from the environment, and  
338 converts the amount of energy into the physiological response that would be necessary  
339 to maintain a stable body temperature (39°C in our simulations). These values represent  
340 the amount of heat that needs to be generated via metabolic heat production or lost via  
341 evaporative cooling to regulate body temperature. We incorporated sources of heat  
342 specifically including air temperature, direct solar radiation, diffuse solar radiation,  
343 reflected radiation from the ground and sky, and longwave radiation from the sky and  
344 ground. We also calculated standard operative temperature ( $T_{es}$ ) to equate simulated  
345 environments in the field to laboratory conditions as shown in Equation 2:

346

$$T_{es} = T_b - \frac{K_e}{K_{es}}(T_b - T_e) \quad \text{Eq. 2}$$

347 where  $T_b$  is body temperature,  $K_e$  is effective conductance,  $K_{es}$  is standard effective  
348 conductance, and  $T_e$  is operative temperature. Standard operative temperature equates  
349 the heat flux that an organism experiences in a black-body temperature-controlled  
350 metabolic chamber under specific convective conditions to that of a complex thermal  
351 environment to predict a physiological response. For our simulations, we assumed  $K_{es}$   
352 represented the effective conductance at 0.1 m/s for our standard convective  
353 conditions. The specific calculations for these simulations can be found in Riddell *et al.*  
354 (2019) and the Python script can be found on GitHub ([github.com/ecophysiology](https://github.com/ecophysiology)).

355 We used these simulations to isolate the thermoregulatory consequences of  
356 geographic variation in dorsal feather reflectance. We were specifically interested in  
357 estimating the water requirements for evaporative cooling (termed ‘cooling costs’)  
358 because these costs are highly relevant to the environmental pressures shaping  
359 physiological adaptation in larks (Tieleman *et al.* 2003a). We estimated cooling costs  
360 across all sites with available climate and elevational data ( $n = 66$ ). For all sites, we  
361 generated estimates of cooling costs using two simulations: one with the average dorsal  
362 reflectance across all sites (average = 0.65) and the other incorporating the site-specific  
363 dorsal reflectance (range = 0.47 – 0.80). Ventral feather reflectance was held constant  
364 (average = 0.69) to specifically focus on the role of dorsal feather reflectance in  
365 camouflage and thermoregulation. For each site, we subtracted the cooling costs  
366 between the two simulations. The difference (termed reduction in cooling costs)

367 provides an index for the site-specific reduction in thermoregulatory pressure driven by  
368 geographic variation in dorsal feather reflectance.

369 We then determined whether the reduction in cooling costs from geographic  
370 variation in reflectance was associated with climatic variables. We fit exponential  
371 models from the  $n/s()$  function in *R* (v4.0.1; R Core Team 2020) to determine the  
372 relationship between the reduction in cooling costs and the principal components of  
373 climatic variables. For climatic variables, we averaged the principal components that  
374 described seasonality (PC1), aridity (PC2), and temperature (PC3; see Table S4 for  
375 loadings). We converted the principal components to positive values by adding the  
376 lowest value to each principal component, which generated interpretable confidence  
377 intervals. Starting values for coefficients were generated using the  $n/sLM()$  function. We  
378 assessed the significance of the models based on the regression coefficients, standard  
379 errors of coefficients, and 95% confidence intervals. We then used an AIC model  
380 selection framework to determine whether models with the principal components of  
381 seasonality, aridity, or temperature were more likely to explain the variation in the  
382 reduction in cooling costs attributed to variation in feather reflectance.

383

## 384 **Results**

### 385 *Phenotypic variation*

386 Plumage characters varied among subspecies and sexes, but also exhibited  
387 substantial overlap. The PCA of plumage characters revealed general clustering by both  
388 subspecies and sex (Figure 2A). For example, *E. a. leucansiptila* tended to have higher  
389 PC1 and PC2 scores, indicating that they were lighter and more patterned compared to

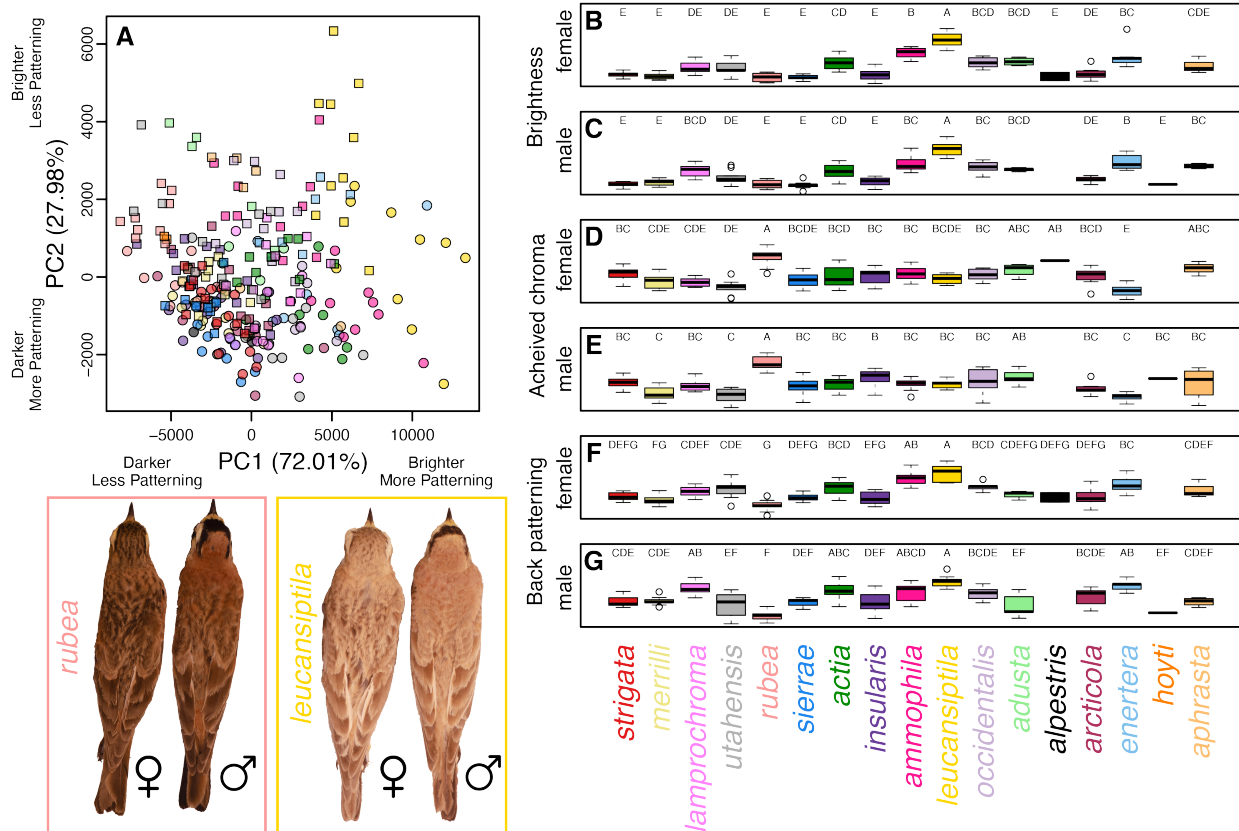

390

391 Figure 2: Phenotypic variation in Horned Lark plumage. A principal component analysis

392 (A) reveals clustering by subspecies (colors correspond to labels below boxplots) and

393 sex (males shown with squares, females shown with circles). Panels B–G show box

394 plots of brightness, achieved chroma, and dorsal patterning for males and females.

395 Letters above each boxplot correspond to Tukey's posthoc groupings. Subspecies are

396 ordered to reflect their approximate geographic distributions from northwest to

397 southeast. Inset on the lower left shows is an example of male and female *E. a. rubea*

398 and *E. a. leucansiptila*, which represent opposite ends of the phenotypic distribution of

399 larks included in this study.

400

401 other subspecies. Furthermore, males tended to have lower PC1 scores and higher

402 PC2 scores than females, indicating that males tended to have less dorsal patterning

403 than females on average. Comparisons of mean values using Tukey's posthoc tests  
404 revealed various groupings among both male and female larks, but also indicated  
405 substantial overlap or gradations in phenotypes among subspecies of Horned Lark  
406 (Figure 2B–G). In parallel with PCA scores and loadings, we found that *E. a.*  
407 *leucansiptila* was in its own posthoc grouping for brightness for both males (Figure 2B)  
408 and females (Figure 2C). Similarly, *E. a. rubea* tended to differ from other subspecies in  
409 mean values for all three plumage variables and was frequently in its own posthoc  
410 grouping for both males and females. Box plots also revealed substantial overlap in  
411 geographically proximate subspecies. For example, the geographic distribution of *E. a.*  
412 *ammophila* overlaps with *E. a. actia* to the west in south-central California, and the two  
413 subspecies exhibited substantial overlap in posthoc groupings. Similar overlap was  
414 present in other pairs of geographically proximate subspecies, such as *E. a.*  
415 *occidentalis* and *E. a. adusta*, which come into contact in southern Arizona. These  
416 results suggest ample clinal variation among subspecies of Horned Lark, as has been  
417 noted elsewhere (Behle 1942).

418

#### 419 *Phenotype-environment associations*

420 Using linear models, we found multiple associations between dorsal plumage  
421 variation and soil conditions underlying background matching in Horned Larks (Figure  
422 3). Specifically, we found that dorsal brightness was positively associated with soil  
423 brightness ( $\beta_{\text{soil brightness}} = 47.17 \pm 3.5$ ; t-value = 13.49;  $P < 0.001$ ) and differed marginally  
424 between sexes ( $\beta_{\text{sex\_male}} = 485.46 \pm 250.21$ ; t-value = 1.94;  $P = 0.05$ ). Achieved chroma  
425 was positively associated with soil redness ( $\beta_{\text{soil redness}} = 2e-3 \pm 3.32e-4$ ; t-value = 6.02;



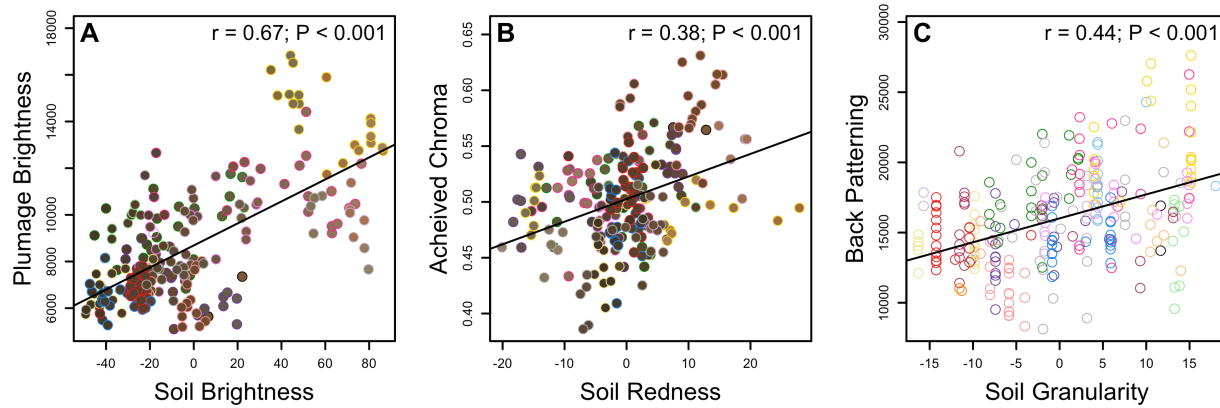

426

427 Figure 3: Associations between plumage and soil conditions indicating background  
428 matching in Horned Larks. In panels A and B, the fill of each point corresponds to the  
429 color of the soil for the locality of the vouchered specimen, which in turn is based on  
430 RGB values of USDA soil surveys. The outline of each point corresponds to the  
431 subspecies, as seen in Figure 1. Results from Pearson's correlation tests are shown in  
432 the upper right hand of each plot. A trend line for the relationship between the two  
433 variables is drawn when the Pearson's correlation test is significant ( $P < 0.05$ ).

434

435  $P < 0.001$ ) and differed marginally between sexes ( $\beta_{\text{sex\_male}} = -0.01 \pm 5.31e-3$ ;  $t\text{-value} = -$   
436  $1.9$ ;  $P = 0.06$ ). Finally, we found that dorsal patterning was associated with soil  
437 granularity ( $\beta_{\text{soil granularity}} = 169.23 \pm 19.91$ ;  $t\text{-value} = 8.50$ ;  $P < 0.001$ ) such that dorsal  
438 plumages with higher contrast patterning were associated with more granular soils (i.e.,  
439 more coarse fragments, more clay), and that males were less patterned than females  
440 ( $\beta_{\text{sex\_male}} = -2358.47 \pm 354.86$ ;  $t\text{-value} = -6.65$ ;  $P < 0.001$ ).

441

442 When we expanded our linear models to consider how bioclimatic and soil  
443 conditions simultaneously impact dorsal reflectance within the same model, we found a  
444 positive association between dorsal plumage brightness (UV-VIS) and soil brightness,

444 seasonality, aridity, and temperature (Table 1). We also found positive associations  
445 between dorsal solar reflectance (UV-VIS-IR) and seasonality and aridity, but not  
446 between dorsal solar reflectance and soil brightness or temperature (Table 1).

447

#### 448 *Heat Flux Simulations*

449 The observed variation in feather reflectance contributed to a substantial  
450 reduction in cooling costs compared to simulations with average feather reflectance.  
451 Incorporation of the observed variation in feather reflectance reduced water  
452 requirements for evaporative cooling by 15.1% on average (SD = 9.1%; range = 4.1% to  
453 70.2%). The reduction in cooling costs was also positively associated with temperature  
454 (PC2) and aridity (PC3) indices but not with seasonality (PC1; Figure 4, Table S5).  
455 Although the reduction in cooling costs was associated with aridity, model selection  
456 indicated that the model with temperature far outperformed models with aridity and  
457 seasonality (Table S6).

458

#### 459 **Discussion**

460 By combining data from digital photography, spectroradiometry, and remote  
461 sensing we documented multiple associations between dorsal plumage and  
462 environmental conditions of Horned Larks over a broad geographic distribution. These  
463 findings emphasize the multifarious role of feathers and animal coloration more  
464 generally. Although lark coloration has long been hypothesized to facilitate camouflage  
465 (Behle 1942; Donald et al. 2017; Mason and Unitt 2018), our study provides the first  
466 empirical evidence of phenotype-environment associations that underlie background

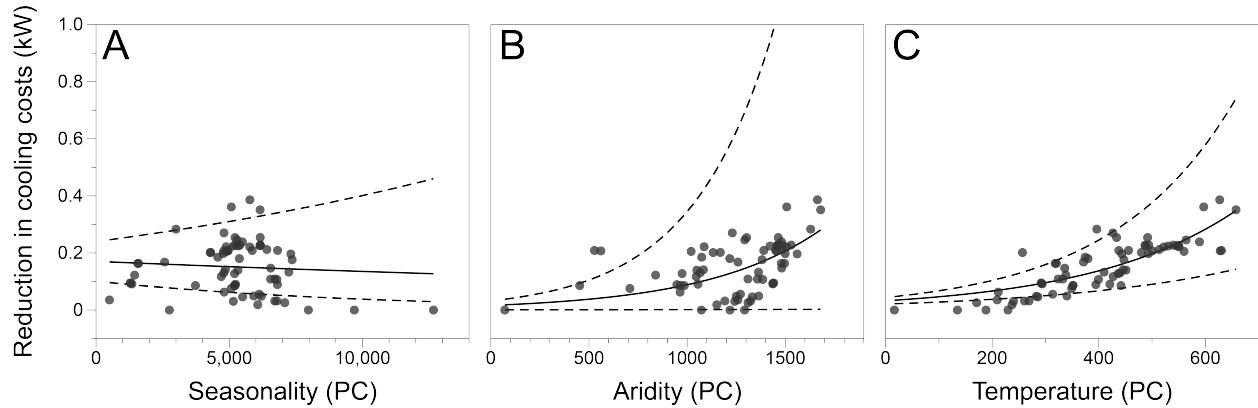

467

468 Figure 4: Variation in feather reflectance reduces thermoregulatory costs in hotter  
469 locations. Shown are the relationships between climatic principal components and the  
470 reduction in water requirements for evaporative cooling (termed cooling costs) due to  
471 variation in dorsal feather reflectance. The reduction in cooling costs was not associated  
472 with the principal component for (A) seasonality but was associated with (B) aridity and  
473 (C) temperature. The analyses suggest that temperature is a major driver of variation in  
474 feather reflectance for thermoregulatory purposes. Exponential models are plotted with  
475 95% confidence intervals in the dotted line.

476

477 matching in larks in brightness, hue, and patterning. Furthermore, full-spectrum  
478 spectroradiometry combined with simulation-based models of thermoregulation  
479 revealed that geographic variation in feather reflectance reduces evaporative cooling  
480 costs in hotter environments. While selective pressures imposed on total solar  
481 reflectance in feathers have just begun to be explored (Stuart-Fox et al. 2017; Medina et  
482 al. 2018), our findings suggest it plays an important role in the thermal ecology of larks.

483 Background matching is one component of a suite of phenotypes that organisms  
484 have evolved to avoid visual detection by predators (Merilaita and Lind 2005; Stevens  
485 and Merilaita 2009). In order to avoid such detection, natural selection has shaped the

486 appearance of many organisms so that they resemble a random sample of the  
487 background against which their predators typically scan for prey (Endler 1978; Michalis  
488 et al. 2017). Dorsal brightness and hue in Horned Larks match the background  
489 substrate (Fig. 3A, Fig. 3B), as has also been shown in mice (Vignieri et al. 2010),  
490 gerbils (Boratyński et al. 2017), moths (Kettlewell 1955), and other taxa (Stevens et al.  
491 2014; Troscianko et al. 2016). There is less empirical evidence for background  
492 matching in pattern as opposed to brightness or color alone, but it has been reported in  
493 cuttlefish (Barbosa et al. 2008), nightjars (Troscianko et al. 2016), and plover eggs  
494 (Stevens et al. 2017). In Horned Larks, increased dorsal 'mottling' with more high-  
495 contrast spots was associated with increases in sand and other coarse particles rather  
496 than with clay and silt (Fig. 3C). Beyond background matching, increased dorsal  
497 patterning in larks may also contribute to disruptive patterning that breaks up the visual  
498 outline of the bird as seen from above (Cuthill et al. 2005). Disruptive patterning in larks  
499 may be associated with molt strategies that promote the retention of worn feathers with  
500 lighter edges (Negro et al. 2019).

501 Our study focused on the substrate encountered by Horned Larks during the  
502 breeding months. However, migratory populations of larks must avoid detection against  
503 multiple, geographically distant substrates that differ in color and composition. Further  
504 contributing to the complexity of this challenge, soil color may change over the course of  
505 a year as precipitation increases or decreases, especially in more seasonal  
506 environments. Horned Larks molt only once per year (Pyle 1997), and thus migratory  
507 populations may need to balance competing pressures for background matching  
508 against different substrates. Future studies could expand upon our results by examining

509 how natural selection shapes organisms with non-dynamic camouflage against multiple  
510 backgrounds.

511 We also uncovered associations between climate and dorsal plumage.  
512 Specifically, we found that solar reflectance (i.e., UV-VIS-NIR reflectance) is associated  
513 with two climatic variables—seasonality and aridity (Table 1)—but bears no association  
514 with soil brightness or temperature (Table 1). Thus, solar reflectance increases as  
515 climates become more arid, presumably to prevent the organism from overheating and  
516 becoming dehydrated. Interestingly, we found greater reductions in cooling costs  
517 associated with temperature than with seasonality or aridity (Fig. 4)—an observation  
518 that conflicts with implications from our linear models as we found no association  
519 between temperature and dorsal solar reflectance in our linear models (Table 1).  
520 However, the modeling approach for cooling costs incorporates additional parameters  
521 such as NIR reflectance, feather conductance, direct and diffuse solar radiation, and  
522 radiation from the ground (Gates 1980). Thus, these findings may not be in direct  
523 conflict with one another, but rather may reflect different methodologies and statistical  
524 assumptions. Regardless, NIR reflectance might play a role in allowing larks to increase  
525 solar reflectance while maintaining crypsis in the visual spectrum. Future work could  
526 further disentangle how the NIR and UV-VIS portions of light co-vary or are  
527 independently selected for optimal thermoregulation in different climates (Stuart-Fox et  
528 al. 2017).

529 There are many other factors beyond modifications to solar reflectance in UV-VIS  
530 and NIR wavelengths that could contribute to the ability of larks to inhabit hot, arid  
531 environments (Trost 1972; Dean and Williams 2004). First, many arid-adapted larks

532 have reduced metabolic rates and increased water retention through various  
533 physiological adaptations (Tieleman et al. 2002). Second, behavioral adaptations also  
534 can reduce heat stress. For example, microhabitat selection such as resting in shade or  
535 animal burrows during extreme heat may contribute to thermoregulation in larks  
536 (Williams et al. 1999; Hartman and Oring 2003; Walde et al. 2009). While Horned Larks  
537 are philopatric and stay close to their breeding territory during the breeding season  
538 (Beason 1970), they are nomadic during non-breeding months and may seek out  
539 favorable habitat within reach of their individual movements to facilitate  
540 thermoregulation. Feathers are one part of a complex suite of phenotypes involved in  
541 maintaining homeostasis in thermally challenging environments. The interplay of  
542 plumage and other physiological and behavioral adaptations for thermoregulation  
543 remains an open avenue of research.

544         In conclusion, our study uncovered empirical evidence for the multifaceted role  
545 that plumage plays in mediating both camouflage and thermoregulation in Horned  
546 Larks. Dorsal plumage and patterning are associated with soil conditions, whereas  
547 feather solar reflectance is associated with abiotic conditions and improved cooling  
548 costs in hotter climates. Future studies could leverage these phenotype-environment  
549 associations in combination with new genomic resources (Mason et al. 2020) to identify  
550 candidate loci driving these local adaptations. Furthermore, Horned Larks are one of  
551 approximately 100 species of larks (Alaudidae) globally that vary in habitat affiliations.  
552 Phylogenetic comparative studies across the family would shed light on whether the  
553 patterns we found here are generalizable across broader taxonomic and evolutionary  
554 scales. Interactions between an organisms' body surfaces and light from the sun are



555 complex, and our study illustrates how natural selection has shaped the phenotypic  
556 variation across different habitats to meet potentially competing demands.

557

### 558 **Data and Code Availability**

559         Raw data and code used in the analyses presented here are available via GitHub  
560 (<https://github.com/mason-lab/HornedLarkCamoThermo>). Raw data and metadata will  
561 be made available via Dryad upon article acceptance.

562 **References**

- 563 Andersson, M., and L. W. Simmons. 2006. Sexual selection and mate choice. Trends in  
564 Ecology & Evolution 21:296–302.
- 565 Bakken, G. S. 1981. A two-dimensional operative-temperature model for thermal energy  
566 management by animals. Journal of Thermal Biology 6:23–30.
- 567 Barbosa, A., L. M. Mäthger, K. C. Buresch, J. Kelly, C. Chubb, C.-C. Chiao, and R. T.  
568 Hanlon. 2008. Cuttlefish camouflage: The effects of substrate contrast and size in  
569 evoking uniform, mottle or disruptive body patterns. Vision Research 48:1242–1253.
- 570 Batjes, N. H. 2016. Harmonized soil property values for broad-scale modelling  
571 (WISE30sec) with estimates of global soil carbon stocks. Geoderma 269:61–68.
- 572 Beason, R. 1970. *The annual cycle of the Prairie Horned Lark in west-central Illinois*  
573 (Master's Thesis). Western Illinois University, Macomb.
- 574 Beason, R. C. 1995. Horned Lark (*Eremophila alpestris*), version 2.0. In The Birds of  
575 North America (A. F. Poole and F. B. Gill, Editors). Cornell Lab of Ornithology, Ithaca,  
576 NY, USA.
- 577 Beaudette, D. E., P. Roudier, and A. T. O'Geen. 2013. Algorithms for quantitative  
578 pedology: A toolkit for soil scientists. Computers & Geosciences 52:258–268.
- 579 Behle, W. 1942. Distribution and variation of the horned larks (*Eremophila alpestris*) of  
580 western North America. University of California Publications in Zoology 46:203–316.
- 581 Boratyński, Z., J. C. Brito, J. C. Campos, J. L. Cunha, L. Granjon, T. Mappes, A.  
582 Ndiaye, et al. 2017. Repeated evolution of camouflage in speciose desert rodents.  
583 Scientific Reports 7:1–10.
- 584 Burt, E. H. 1981. The adaptiveness of animal colors. BioScience 31:723–729.

- 585 ———. 2004. GLOGER'S RULE, FEATHER-DEGRADING BACTERIA, AND COLOR  
586 VARIATION AMONG SONG SPARROWS. *Condor* 106:681–686.
- 587 Campbell, G., and J. Norman. 1998. An introduction to environmental biophysics (2nd  
588 edition.). Springer-Verlag, New York, NY.
- 589 Caro, T. 2017. Wallace on Coloration: Contemporary Perspective and Unresolved  
590 Insights. *Trends in Ecology & Evolution* 32:23–30.
- 591 Caro, T., T. N. Sherratt, and M. Stevens. 2016. The ecology of multiple colour defences.  
592 *Evolutionary Ecology* 30:797–809.
- 593 Cook, L. M., and I. J. Saccheri. 2013. The peppered moth and industrial melanism:  
594 Evolution of a natural selection case study. *Heredity* 110:207–212.
- 595 Cott, H. B. 1944. *Adaptive Coloration in Animals*. Bradford and Dickens Drayton House,  
596 London.
- 597 Cuthill, I. C., W. L. Allen, K. Arbuckle, B. Caspers, G. Chaplin, M. E. Hauber, G. E. Hill,  
598 et al. 2017. The biology of color. *Science* 357:eaan0221.
- 599 Cuthill, I. C., M. Stevens, J. Sheppard, T. Maddocks, C. A. Párraga, and T. S.  
600 Troscianko. 2005. Disruptive coloration and background pattern matching. *Nature*  
601 434:72–74.
- 602 de Mendiburu, F. 2020. *agricolae: Statistical Procedures for Agricultural Research*.
- 603 de Zwaan, D. R., and K. Martin. 2018. Substrate and structure of ground nests have  
604 fitness consequences for an alpine songbird. *Ibis* 160:790–804.
- 605 Dean, W. R. J., and J. B. Williams. 2004. Adaptations of birds for life in deserts with  
606 particular reference to Larks (Alaudidae). *Transactions of the Royal Society of South*  
607 *Africa* 59:79–91.

608 Delhey, K. 2019. A review of Gloger's rule, an ecogeographical rule of colour:  
609 definitions, interpretations and evidence. *Biological Reviews* brv.12503.

610 Delhey, K., J. Dale, M. Valcu, and B. Kempenaers. 2019. Reconciling ecogeographical  
611 rules: rainfall and temperature predict global colour variation in the largest bird radiation.  
612 (G. Grether, ed.) *Ecology Letters* 22:726–736.

613 Donald, P. F., P. Alström, and D. Engelbrecht. 2017. Possible mechanisms of substrate  
614 colour-matching in larks (*Alaudidae*) and their taxonomic implications. *Ibis* 159:699–702.

615 Endler, J. A. 1978. A Predator's View of Animal Color Patterns. *Evolutionary Biology*  
616 319–364.

617 Farkas, T. E., T. Mononen, A. A. Comeault, I. Hanski, and P. Nosil. 2013. Evolution of  
618 camouflage drives rapid ecological change in an insect community. *Current Biology*  
619 23:1835–1843.

620 Gates, D. 1980. *Solar Radiation*. Biophysical Ecology, Springer Advanced Texts in Life  
621 Sciences. Springer, New York, NY.

622 Gloger, C. W. L. 1833. *Das Abändern der Vögel durch Einfluss des Klimas*. August  
623 Schulz, Breslau, Germany.

624 Godfrey, D., J. N. Lythgoe, and D. A. Rumball. 1987. Zebra stripes and tiger stripes: the  
625 spatial frequency distribution of the pattern compared to that of the background is  
626 significant in display and crypsis. *Biological Journal of the Linnean Society* 32:427–433.

627 Gueymard, C. A. 2001. Parameterized transmittance model for direct beam and  
628 circumsolar spectral irradiance. *Solar Energy* 71:325–346.

629 Hartman, C. A., and L. W. Oring. 2003. Orientation and microclimate of horned lark  
630 nests: the importance of shade. *The Condor* 105:158–163.

631 Hijmans, R. J., S. E. Cameron, J. L. Parra, P. G. Jones, and A. Jarvis. 2005. Very high  
632 resolution interpolated climate surfaces for global land areas. *International Journal of*  
633 *Climatology* 25:1965–1978.

634 Isaac, L. A., and P. T. Gregory. 2013. Can snakes hide in plain view? Chromatic and  
635 achromatic crypsis of two colour forms of the Western Terrestrial Garter Snake  
636 (*Thamnophis elegans*). *Biological Journal of the Linnean Society* 108:756–772.

637 Kearney, M. R., and W. P. Porter. 2020. NicheMapR – an R package for biophysical  
638 modelling: the ectotherm and Dynamic Energy Budget models. *Ecography* 43:85–96.

639 Kearney, M. R., W. P. Porter, and S. A. Murphy. 2016. An estimate of the water budget  
640 for the endangered night parrot of Australia under recent and future climates. *Climate*  
641 *Change Responses* 3:14.

642 Kettlewell, H. B. D. 1955. Selection experiments on industrial melanism in the  
643 *Lepidoptera*. *Heredity* 9:323–342.

644 Laurent, S., S. P. Pfeifer, M. L. Settles, S. S. Hunter, K. M. Hardwick, L. Ormond, V. C.  
645 Sousa, et al. 2016. The population genomics of rapid adaptation: disentangling  
646 signatures of selection and demography in white sands lizards. *Molecular Ecology*  
647 25:306–323.

648 Linnen, C. R., E. P. Kingsley, J. D. Jensen, and H. E. Hoekstra. 2009. On the origin and  
649 spread of an adaptive allele in deer mice. *Science* 325:1095–1098.

650 Maia, R., C. M. Eliason, P.-P. Bitton, S. M. Doucet, and M. D. Shawkey. 2013. pavo : an  
651 R package for the analysis, visualization and organization of spectral data. (A. Tatem,  
652 ed.) *Methods in Ecology and Evolution* n/a-n/a.

653 Maia, R., H. Gruson, J. A. Endler, and T. E. White. 2019. PAVO 2: New tools for the  
654 spectral and spatial analysis of colour in R. (R. B. O'Hara, ed.) *Methods in Ecology and*  
655 *Evolution* 10:1097–1107.

656 Marcondes, R. S., K. F. Stryjewski, and R. T. Brumfield. 2020. Testing the simple and  
657 complex versions of Gloger's rule in the Variable Antshrike (*Thamnophilus*  
658 *caerulescens*, *Thamnophilidae*). *The Auk* 137:ukaa026.

659 Mason, N. A., and R. C. K. Bowie. 2020. Plumage patterns: Ecological functions,  
660 evolutionary origins, and advances in quantification. *The Auk* ukaa060.

661 Mason, N. A., P. Pulgarin, C. D. Cadena, and I. J. Lovette. 2020a. *De novo* assembly of  
662 a high-quality reference genome for the Horned Lark (*Eremophila alpestris*).  
663 *G3:Genes|Genomes|Genetics* 10:475–478.

664 Mason, N. A., and P. Unitt. 2018. Rapid phenotypic change in a native bird population  
665 following conversion of the Colorado Desert to agriculture. *Journal of Avian Biology*  
666 49:1–6.

667 Mason, N., P. Unitt, and J. Sparks. 2020b. Agriculture induces isotopic shifts and niche  
668 contraction in Horned Larks (*Eremophila alpestris*) of the southern Colorado Desert.  
669 *Journal of Ornithology* In Press.

670 Medina, I., E. Newton, M. R. Kearney, R. A. Mulder, W. P. Porter, and D. Stuart-Fox.  
671 2018. Reflection of near-infrared light confers thermal protection in birds. *Nature*  
672 *Communications* 9:3610.

673 Merilaita, S., and J. Lind. 2005. Background-matching and disruptive coloration, and the  
674 evolution of cryptic coloration. *Proceedings of the Royal Society B: Biological Sciences*  
675 272:665–670.

- 676 Merilaita, S., J. Tuomi, and V. Jormalainen. 1999. Optimization of cryptic coloration in  
677 heterogeneous habitats. *Biological Journal of the Linnean Society* 67:151–161.
- 678 Michalis, C., N. E. Scott-Samuel, D. P. Gibson, and I. C. Cuthill. 2017. Optimal  
679 background matching camouflage. *Proceedings of the Royal Society B: Biological*  
680 *Sciences* 284.
- 681 Nachman, M. W., H. E. Hoekstra, and S. D'Agostino. 2003. The genetic basis of  
682 adaptive melanism in pocket mice. *Proceedings of the National Academy of Sciences of*  
683 *the United States of America* 100:5268–5273.
- 684 Negro, J. J., I. Galván, and J. Potti. 2019. Adaptive plumage wear for increased crypsis  
685 in the plumage of Palearctic larks (Alaudidae). *Ecology* 100.
- 686 Porter, W. P., and D. M. Gates. 1969. Thermodynamic Equilibria of Animals with  
687 Environment. *Ecological Monographs* 39:227–244.
- 688 Pyle, P. 1997. *Identification Guide to North American Birds. Part I: Columbidae to*  
689 *Ploceidae*. Braun-Brumfield, Ann Arbor, Michigan.
- 690 R Core Team. 2020. *R: A language and environment for statistical computing*. R  
691 *Foundation for Statistical Computing*, Vienna, Austria.
- 692 Riddell, E. A., K. J. Iknayan, B. O. Wolf, B. Sinervo, and S. R. Beissinger. 2019. Cooling  
693 requirements fueled the collapse of a desert bird community from climate change.  
694 *Proceedings of the National Academy of Sciences* 201908791.
- 695 Rosenblum, E. B., H. Rompler, T. Schoneberg, and H. E. Hoekstra. 2009. Molecular  
696 and functional basis of phenotypic convergence in white lizards at White Sands.  
697 *Proceedings of the National Academy of Sciences* 107:2113–2117.



698 ———. 2010. Molecular and functional basis of phenotypic convergence in white lizards  
699 at White Sands. *Proceedings of the National Academy of Sciences* 107:2113–2117.

700 Sanderman, J., T. Hengl, and G. J. Fiske. 2017. Soil carbon debt of 12,000 years of  
701 human land use. *Proceedings of the National Academy of Sciences* 114:9575–9580.

702 Schneider, C. A., W. S. Rasband, and K. W. Eliceiri. 2012. NIH Image to ImageJ: 25  
703 years of image analysis. *Nature Methods* 9:671–675.

704 Shultz, A. J., and K. J. Burns. 2017. The role of sexual and natural selection in shaping  
705 patterns of sexual dichromatism in the largest family of songbirds (Aves: Thraupidae).  
706 *Evolution* 71:1061–1074.

707 Smith, K. R., V. Cadena, J. A. Endler, M. R. Kearney, W. P. Porter, and D. Stuart-Fox.  
708 2016. Color Change for Thermoregulation versus Camouflage in Free-Ranging Lizards.  
709 *The American Naturalist* 188:668–678.

710 Steel, R., J. Torrie, and D. Dickey. 1997. *Principles and Procedures of Statistics: A*  
711 *Biometrical Approach*. McGraw-Hill.

712 Stevens, M., A. E. Lown, and L. E. Wood. 2014. Color change and camouflage in  
713 juvenile shore crabs *Carcinus maenas*. *Frontiers in Ecology and Evolution* 2:1–14.

714 Stevens, M., and S. Merilaita. 2009. Animal camouflage: current issues and new  
715 perspectives. *Philosophical Transactions of the Royal Society B: Biological Sciences*  
716 364:423–427.

717 Stevens, M., J. Troscianko, J. K. Wilson-Aggarwal, and C. N. Spottiswoode. 2017.  
718 Improvement of individual camouflage through background choice in ground-nesting  
719 birds. *Nature Ecology & Evolution* 1:1325–1333.

- 720 Stoddard, M. C., and D. Osorio. 2019. Animal coloration patterns: linking spatial vision  
721 to quantitative analysis. *The American Naturalist* 193:164–186.
- 722 Stoddard, M. C., and R. O. Prum. 2008. Evolution of avian plumage color in a  
723 tetrahedral color space: a phylogenetic analysis of New World buntings. *The American*  
724 *Naturalist* 171:755–776.
- 725 Stoddard, M. C., and M. Stevens. 2010. Pattern mimicry of host eggs by the Common  
726 Cuckoo, as seen through a bird's eye. *Proceedings of the Royal Society B: Biological*  
727 *Sciences* 277:1387–1393.
- 728 Stuart-Fox, D., E. Newton, and S. Clusella-Trullas. 2017. Thermal consequences of  
729 colour and near-infrared reflectance. *Philosophical Transactions of the Royal Society B:*  
730 *Biological Sciences* 372:20160345.
- 731 Tieleman, B. I., J. B. Williams, and P. Bloomer. 2003a. Adaptation of metabolism and  
732 evaporative water loss along an aridity gradient. *Proceedings of the Royal Society of*  
733 *London. Series B: Biological Sciences* 270:207–214.
- 734 Tieleman, B. I., J. B. Williams, and M. E. Buschur. 2002. Physiological Adjustments to  
735 Arid and Mesic Environments in Larks ( *Alaudidae* ). *Physiological and Biochemical*  
736 *Zoology* 75:305–313.
- 737 Tieleman, B. I., J. B. Williams, M. E. Buschur, and C. R. Brown. 2003b. PHENOTYPIC  
738 VARIATION OF LARKS ALONG AN ARIDITY GRADIENT: ARE DESERT BIRDS  
739 MORE FLEXIBLE? *Ecology* 84:1800–1815.
- 740 Troscianko, J., and M. Stevens. 2015. Image calibration and analysis toolbox - a free  
741 software suite for objectively measuring reflectance, colour and pattern. (S. Rands,  
742 ed.) *Methods in Ecology and Evolution* 6:1320–1331.

743 Troscianko, J., J. Wilson-Aggarwal, M. Stevens, and C. N. Spottiswoode. 2016.  
744 Camouflage predicts survival in ground-nesting birds. *Scientific Reports* 6:19966.  
745 Trost, C. H. 1972. Adaptations of Horned Larks (*Eremophila alpestris*) to Hot  
746 Environments. *The Auk* 89:506–527.  
747 Van't Hof, A. E., N. Edmonds, M. Dalíková, F. Marec, and I. J. Saccheri. 2011. Industrial  
748 melanism in british peppered moths has a singular and recent mutational origin.  
749 *Science* 332:958–960.  
750 Vignieri, S. N., J. G. Larson, and H. E. Hoekstra. 2010. The selective advantage of  
751 crypsis in mice. *Evolution* 64:2153–2158.  
752 Vo, A.-T. E., M. S. Bank, J. P. Shine, and S. V. Edwards. 2011. Temporal increase in  
753 organic mercury in an endangered pelagic seabird assessed by century-old museum  
754 specimens. *Proceedings of the National Academy of Sciences* 108:7466–7471.  
755 Vorobyev, M., and D. Osorio. 1998. Receptor noise as a determinant of colour  
756 thresholds. *Proceedings of the Royal Society of London. Series B: Biological Sciences*  
757 265:351–358.  
758 Vorobyev, M., D. Osorio, A. T. D. Bennett, N. J. Marshall, and I. C. Cuthill. 1998.  
759 Tetrachromacy, oil droplets and bird plumage colours. *Journal of Comparative*  
760 *Physiology A: Sensory, Neural, and Behavioral Physiology* 183:621–633.  
761 Wacker, C. B., B. M. McAllan, G. Körtner, and F. Geiser. 2016. The functional  
762 requirements of mammalian hair: a compromise between crypsis and thermoregulation?  
763 *The Science of Nature* 103:53.

764 Walde, A. D., A. M. Walde, D. K. Delaney, and L. L. Pater. 2009. Burrows of Desert  
765 Tortoises (*Gopherus agassizii*) as Thermal Refugia for Horned Larks (*Eremophila*  
766 *alpestris*) in the Mojave Desert. *The Southwestern Naturalist* 54:375–381.

767 Walsberg, G. E. 1983. Coat Color and Solar Heat Gain in Animals. *BioScience* 33:88–  
768 91.

769 ———. 1988. Heat flow through avian plumages: The relative importance of conduction,  
770 convection, and radiation. *Journal of Thermal Biology* 13:89–92.

771 Williams, J. B., B. I. Tieleman, and M. Shobrak. 1999. Lizard Burrows Provide Thermal  
772 Refugia for Larks in the Arabian Desert. *The Condor* 101:714–717.

773 Wolf, B. O., and G. E. Walsberg. 2000. The Role of the Plumage in Heat Transfer  
774 Processes of Birds. *American Zoologist* 40:575–584.

775 Zink, R. M., and J. V. Remsen. 1986. Evolutionary Processes and Patterns of  
776 Geographic Variation in Birds. *Current Ornithology* 4:1–69.

777

778 **Tables**

779 Table 1: Linear model output for plumage-environment associations. *P*-values with  
 780 asterisks indicate statistically significant terms (*\*P* < 0.05; *\*\*P* < 0.01; *\*\*\*P* < 0.001).

781

| Response Variable        | Predictor Variable        | Beta + SE         | t-value | <i>P</i> -value |
|--------------------------|---------------------------|-------------------|---------|-----------------|
| Dorsal Brightness        | Intercept                 | 8420.53 ± 138.09  | 60.98   | <0.001***       |
|                          | Sex (male)                | 418.17 ± 192.97   | 2.17    | 0.03*           |
|                          | Soil brightness           | 18.59 ± 3.58      | 5.19    | <0.001***       |
|                          | BioClim PC1 (seasonality) | 0.17 ± 0.06       | 2.56    | 0.01*           |
|                          | BioClim PC2 (aridity)     | 4.53 ± 0.38       | 11.85   | <0.001***       |
|                          | BioClim PC3 (temperature) | 5.17 ± 0.92       | 5.61    | <0.001***       |
| Dorsal Solar Reflectance | Intercept                 | 0.34 ± 6.82e-3    | 49.78   | <0.001***       |
|                          | Sex (male)                | 1.15e-3 ± 9.53e-3 | 0.12    | 0.90            |
|                          | Soil brightness           | 1.48e-4 ± 1.77e-4 | 0.84    | 0.40            |
|                          | BioClim PC1 (seasonality) | 2.14e-5 ± 3.20e-6 | 6.67    | <0.001***       |
|                          | BioClim PC2 (aridity)     | 8.49e-5 ± 1.88e-5 | 4.50    | <0.001***       |
|                          | BioClim PC3 (temperature) | 4.85e-5 ± 4.55e-5 | 1.06    | 0.29            |

782

783 Table 2: Non-linear regression analyses for investigating the relationship between the  
784 reduction in cooling costs, temperature, and aridity. Slopes and standard errors are  
785 presented and correspond to parameters in the exponential function  $f(x) = a^{bx}$ .

786

| <b>Temperature model</b> | <b><i>a</i></b> | <b><i>b</i></b> |
|--------------------------|-----------------|-----------------|
| Slope ± SE               | 0.040 ± 0.005   | 0.097 ± 0.008   |
| <i>t</i> -value          | 7.529           | 12.747          |
| <i>p</i> -value          | < 0.001         | < 0.001         |

  

| <b>Aridity model</b> |                 |                 |
|----------------------|-----------------|-----------------|
| Slope ± SE           | 0.1244 ± 0.0117 | 0.0017 ± 0.0003 |
| <i>t</i> -value      | 10.636          | 4.926           |
| <i>p</i> -value      | < 0.001         | < 0.001         |

787

788
